# Supplementary material
Source: Research Square preprint supplement (doi:10.21203/rs.3.rs-8819085/v1)
Supplement: Supplementary file 1 [file fbeb2a2948bab7a4514b23cb.docx]

**SUPPORTING INFORMATION**

**Mechanistic Insights into Binding, Configuration, Coverage, and Reaction Rates of Hydrogen on Platinum Surfaces**

Hui Wang1, Haley Fisher1, Haibin Wu2, Jesse B. Brown1, Zhi-Chao Huang-Fu 1*, Yuqin Qian1, Shutang Chen2*, Yi Rao1*

1Department of Chemistry and Biochemistry, Utah State University

2Honda Research Institute, USA, Inc., San Jose, CA 95134, United States

**Table of Contents**

1. Experimental Details and Theory
2. Potential-Dependent PPP- and SSP-Polarized Constant-Potential SFG Spectra
3. Scan Rate-Dependent EC-SFG
4. Density and Free energy of *H at Pt Surface Calculated from Charge Q
5. Faraday Current and Capacitive Current
6. The Generation Rates at Different Potential
7. The Binding Energy of Pt-H* at Different Potentials
8. Tafel Analysis: Tafel Slope and Exchange Current Density
9. SI References
10. **Experimental Details and Theory**

*EC-SFG Optical Setup*.1 An integrated femtosecond laser amplifier operating at 100 kHz (PHAROS, Light Conversion) was the main light source for EC-SFG experiments. The 1026.21 nm 10 W output was used to pump an optical parametric amplifier (OPA, ORPHEUS-ONE, Light Conversion) to produce two tunable near-IR pulses which were down-converted by a difference frequency generator (Lucia, Light Conversion) to yield a tunable mid-IR pulse with tunable wavelength from 4.5 to 11.0 μm. The mid IR and residual fundamental pulses were then focused on the sample cell in a collinear geometry at an incident angle of 60º relative to the surface normal. The fs upconverting pulse was converted to a ps pulse using an etalon (SLS Optics) to provide spectral resolution of 8 cm-1, and its polarization was controlled using a halfwave plate. After the incident pulses were diffracted through the CaF2 sample cell window, they were incident on the electrode/electrolyte interface with an angle of 40º. The focal spots of the fundamental and IR pulses were 0.141 and 0.019 mm2, with pulse energies of 4.5 µJ and 0.1 µJ, respectively. The EC-SFG signal was polarization-resolved with a thin film analyzer and collected into a spectrometer (Acton 300i, Princeton Instruments) fitted with a charge-coupled device (LN/CCD-1340/400, Princeton Instruments) for spectral detection. Pulse polarizations are defined to be parallel (P) or perpendicular (S) to the incident plane, and are reported in order of increasing wavelength: SFG signal, 1026.21 nm, and IR.

**Figure S1**. Schematic of electrochemical sum-frequency generation (EC-SFG) experimental cell detailing electrode and beam geometries.


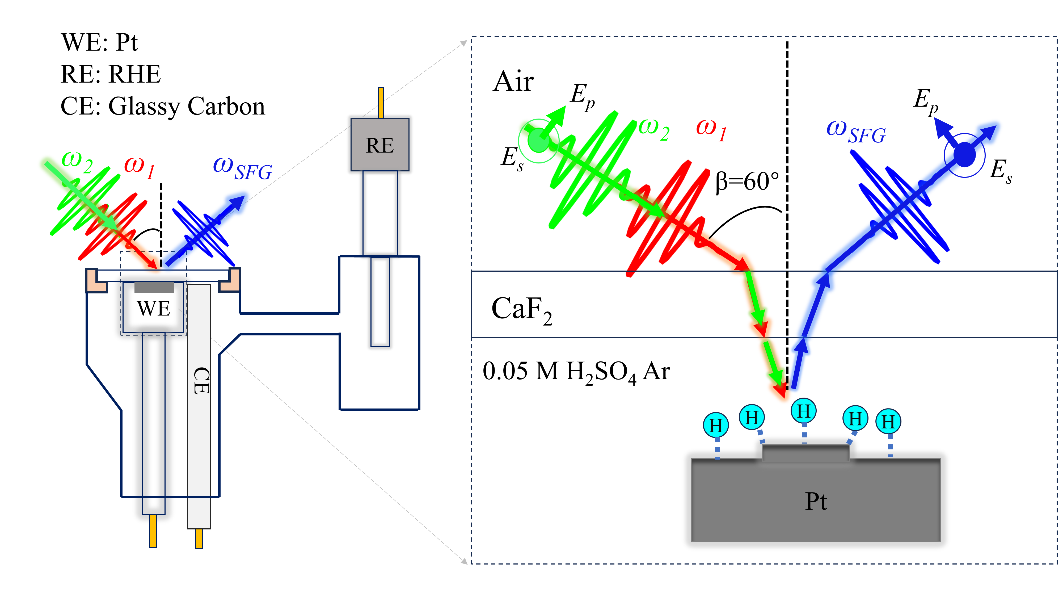


*Electrochemical Measurements.* Simultaneous EC-SFG measurements integrated a potentiostat (Interface1000, Gamry Instruments) with the optical EC cell to supply a potential to the system synchronized with spectral collection through LabVIEW. The working electrode was 5 mm diameter polycrystalline Pt, the counter electrode was 2 mm glassy carbon, and the eferene electrode was a reversible hydrogen electrode (RHE, Interface1000, Gaskatel). All reported values were with reference to the RHE. Before the experiment, all components of the electrochemical cell cleaned in 5:1:1 water:H2O2:NH3OH for 1 hour at 80°C followed by ultra-pure DI-water (18.2 MΩ cm).2 All O-rings and electrodes were cleaned in 1M HNO3 and 1M H2SO4 for 20 mins each. The working and counter electrodes were polished using 1 and 0.05 um alpha or gamma alumina powder (Al2O3, LECO) to a mirror finish before experiments. Then, the Pt electrode was cleaned in a 0.05 M H2SO4 (saturated Ar) solution through cyclic voltammetry (CV) from 0.05 to 1.55 V for 50 cycles at 100 mV s-1.3, 4

*Chemicals.* H2SO4 (99.999%,) was purchased from Sigma Aldrich. Ammonium Hydroxide (ACS Reagent Grade) was purchased from Pharmco by Greenfield Global. Hydrogen Peroxide (ACS Grade 30%) was purchased from Thermo Scientific. Nitric acid (70%) was purchased from Avantor.

To use EC-SFG to investigate H atom adsorption and desorption thermodynamics and kinetics *in situ*, we turn to resonant SFG. The intensity of the SFG signal, , is proportional to the incident intensities, and , such that

S(1)

where are the refractive indices of the bulk medium, *β* is the reflection angle, and *c* is the speed of light in a vacuum. The component of is directly proportional to the number density of resonant oscillators at the surface, , such that

, S(2)

where < > is the ensemble average of the orientational distributions of the adsorbed species, and is the molecular hyperpolarizability which describes the materials microscopic molecular response to the incident electric fields.

Using these relationships we can begin to use resonant EC-SFG to study HER/HOR on Pt electrodes *in-situ*. The SFG intensity scales with the square of the molecular population, whereas the SFG electric field is linearly dependent on it. This is particularly important for probing hydrogen coverage on Pt, as the SFG field amplitude directly reflects the surface population.

1. **Potential-Dependent PPP- and SSP-Polarized Constant-Potential SFG Spectra**

**Figure S2**. Normalized EC-SFG spectra of *H at Pt surface with PPP (A) and SSP (B) polarization combination at constant potential arranged from 0.25 V to -0.125 V at 0.025 V intervals.


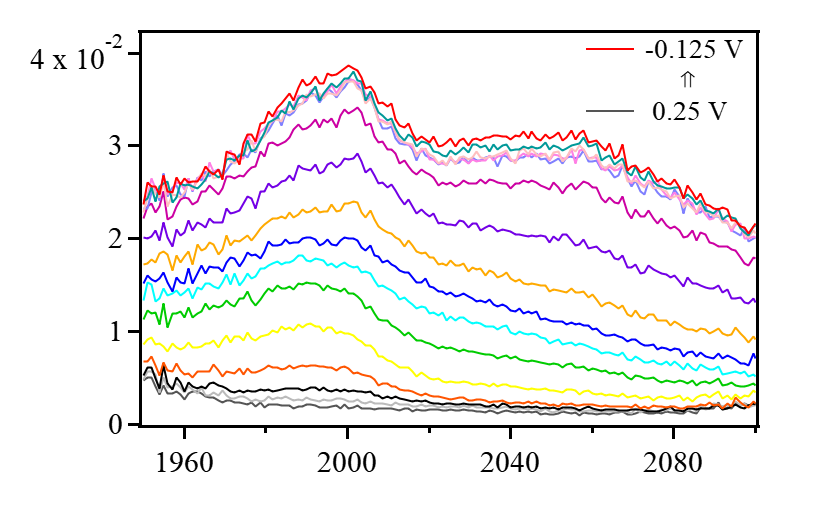

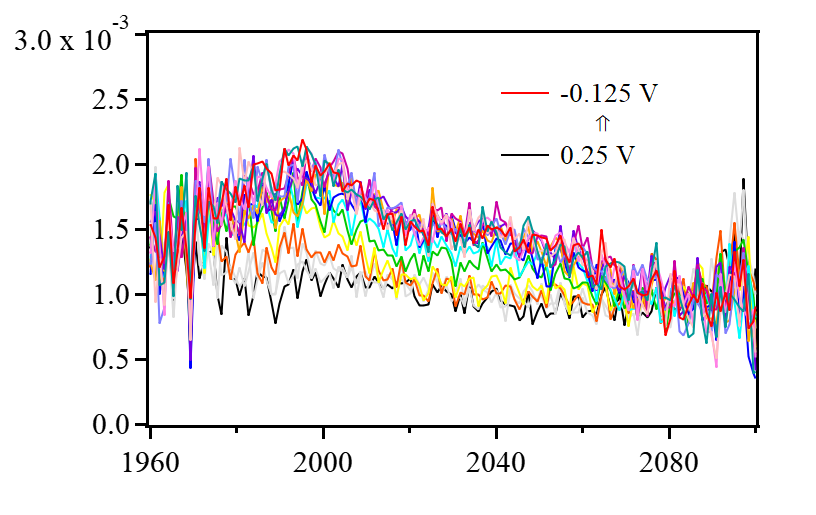


Normalized PPP Intensity

Normalized SSP Intensity

Wavenumber (cm-1)

Wavenumber (cm-1)

(A)

(B)

Figure S2 presents normalized EC-SFG spectra of adsorbed hydrogen (*H) on a Pt electrode surface collected under PPP and SSP polarization combinations at constant potentials and a pulse delay time of 350 fs. Each spectrum was acquired over a 300 s integration period and normalized against the SFG intensity obtained from an Au surface under identical conditions.

The SFG signal under PPP polarization is significantly stronger than that under SSP polarization, indicating that the Pt–H bond is predominantly oriented perpendicular to the Pt surface with a small tilt angle.

Potential (V) RHE

Orientation Angle°

(A)


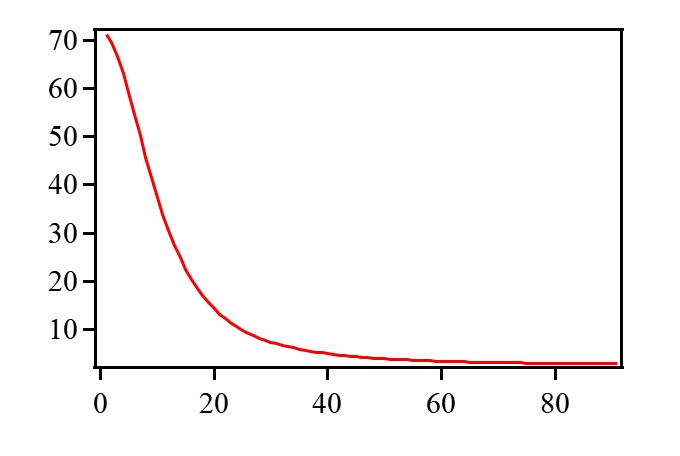


**Figure S3**. (A) Simulated as a function of Pt-H* bond tilt angle (degrees) with respect to the surface normal using symmetry and *r* = 0.02. (B) Experiment as a function of potential.


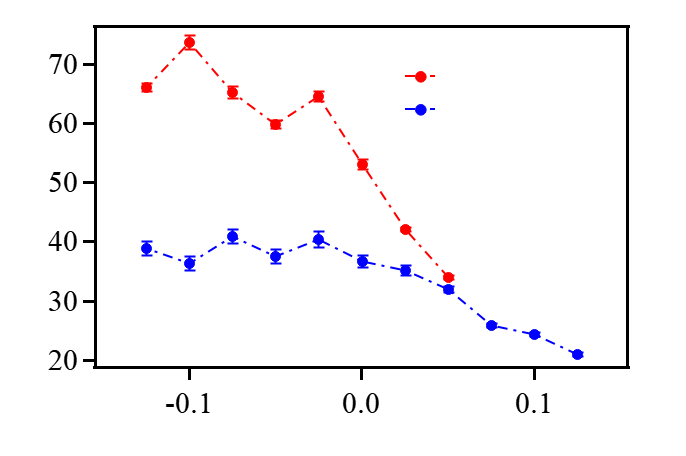


(B)

*Hterrace

*Hstep

Figure S3(A) shows the simulation result between with orientation angle. The detail about the orientation angle analysis can be found in previous work.1, 5 The refractive index for SFG, 1026.21 and IR is 3.0092+5.1706i, 3.5348+5.8406 and 3.7908+18.5240i, respectively.6 Figure S3(B) shows the change in experimental as a function of applied potential.

1. **Scan Rate-Dependent EC-SFG**

(E)

1.0 mV s-1

(A)

**Figure S4**. EC-SFG maps (left, A-D) and normalized intensity (right, E-H) as a function of potential of *H at Pt surface under PPP polarization and scan rates of 1.0 mV s-1 (A), 2.0 mV s-1 (B), 5.0 mV s-1 (C) and 10.0 mV s-1 (D), with blue and red traces representing *Hstep and *Hterrace peaks, respectively.

(B)

(C)


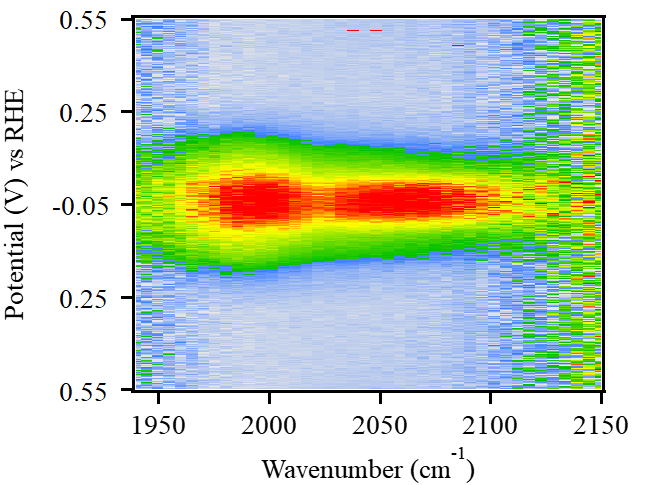

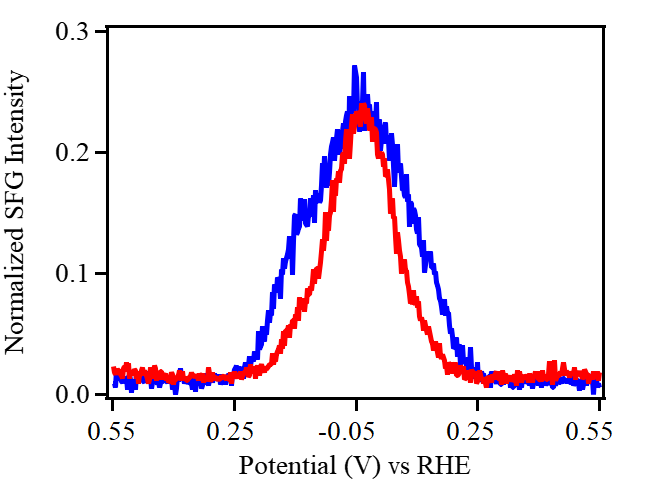

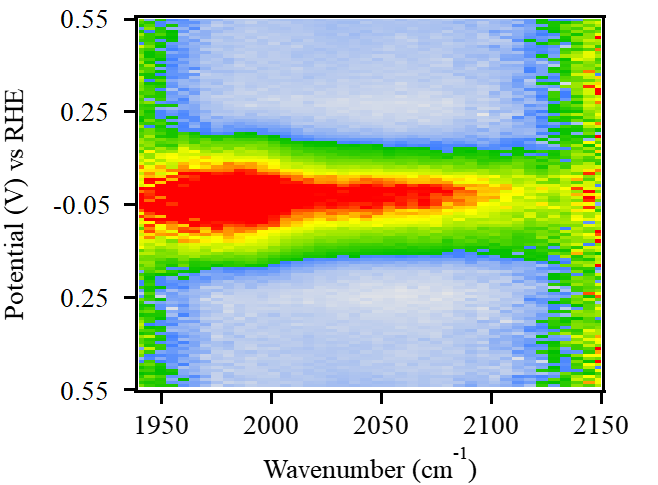

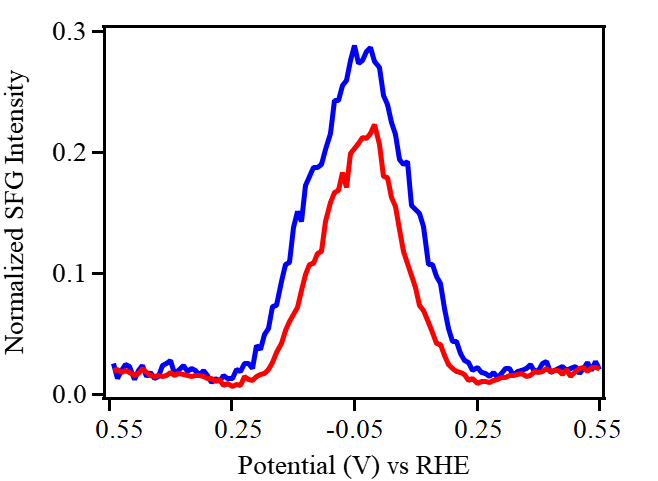

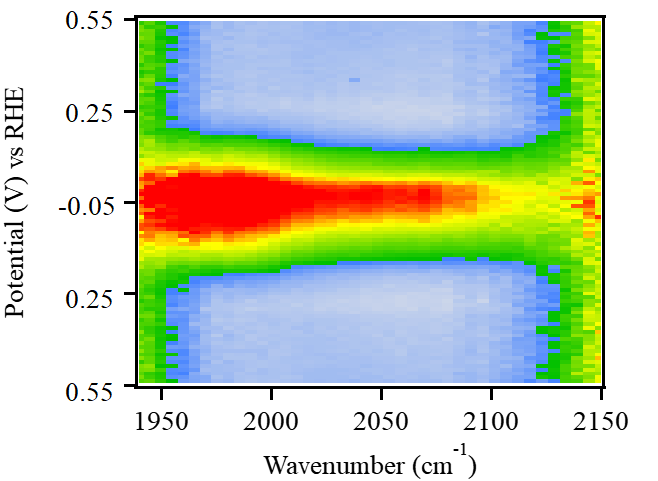

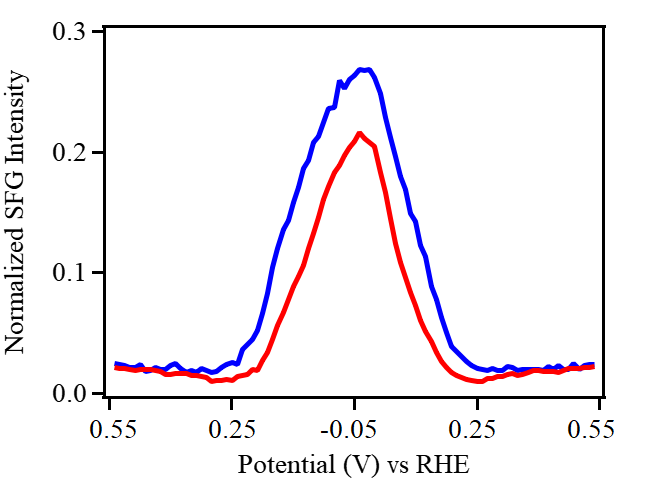

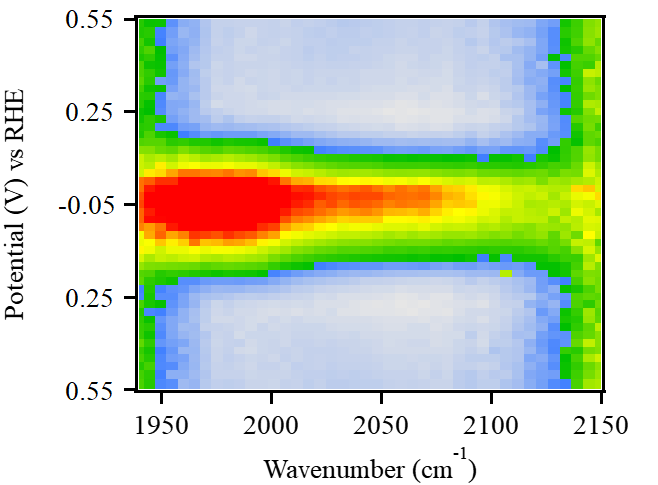

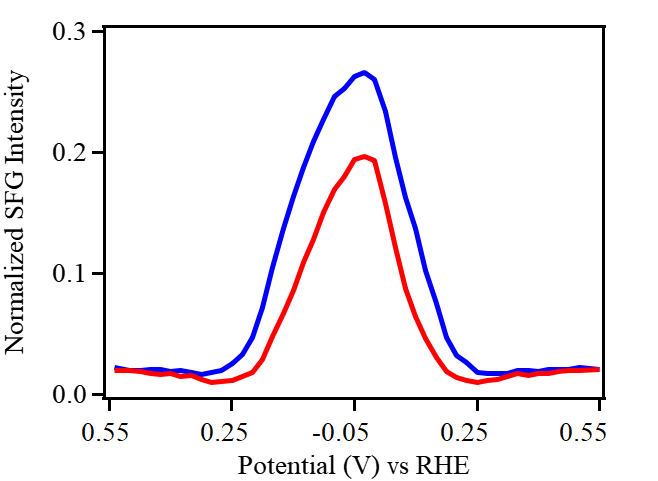


(D)

(H)

Potential (V) RHE

Potential (V) RHE

Potential (V) RHE

Potential (V) RHE

Normalized Intensity

Normalized Intensity

Normalized Intensity

Normalized Intensity

1.0 mV s-1

2.0 mV s-1

5.0 mV s-1

10.0 mV s-1

2.0 mV s-1

5.0 mV s-1

10.0 mV s-1

(F)

(G)

Potential (V) RHE

Wavenumber (cm-1)

Figure S4 shows the EC-SFG spectra of PPP polarization with scan rates of 1.0 mV s-1, 2.0 mV s-1, 5.0 mV s-1, and 10.0 mV s-1, respectively.

Figure S5(A) shows the corresponding CVs with different scan rates. When the scan rate is faster, the *H peak becomes stronger, being the clearest for 20.0 mV s-1. Interestingly, the shift in the *H peak position between the cathodic and anodic CV sweeps becomes more drastic for faster scan rates, as indicated by the vertical dashed lines. From these experiments, we extracted the change in peak position, ΔV (red, left), and the peak current (blue, right), as a function of scan rate, as shown in Figure S5(B). Here we found that the peak current increases linearly with an increasing scan rate while ΔV increases nonlinearly. The inset demonstrates that the peak current increases linearly through 100.0 mV s-1. From the literature, When the current intensity is proportional to the scan rate, it indicates that adsorption control is dominant.7

**Figure S5.** (A) CVs of the system at different scan rates. (B) Potential shift (ΔV) (red, left) for *H peak and the current (blue, right) as a function of scan rate.


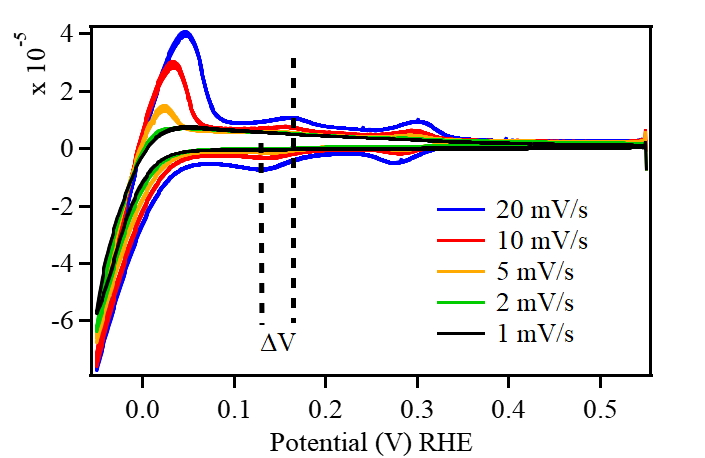

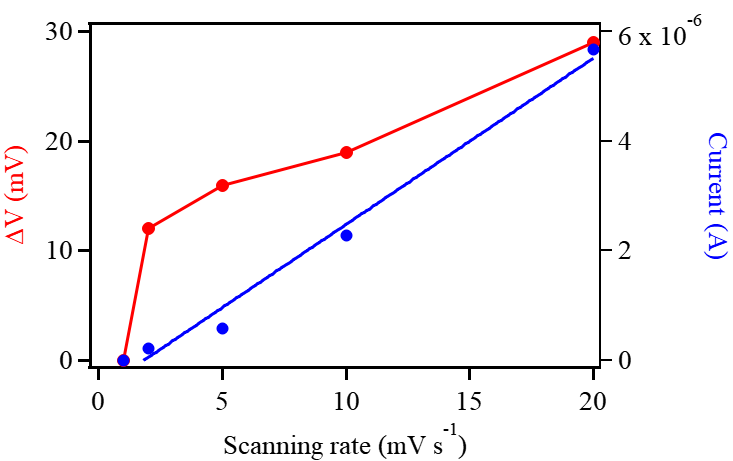


(B)

(A)


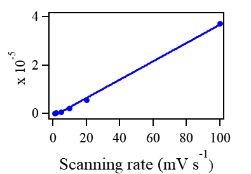


Current (A)

Spectroscopically, we found that the cathodic and anodic scans are symmetric for the lower scan rates but become more asymmetric for the higher scan rates for both adsorption geometries. This is shown explicitly in Figure 2(C) for the potential-dependent intensities at 20.0 mV s-1. These electrochemical results can help further-characterize HOR on Pt electrodes. From Figure S5(A), a strong peak appeared around 0.0 to 0.05 V for the anodic scan which has been assigned to HOR. From the current, we can obtain the density of *H from H2 and the generation of H+, yielding 1.44×10-7 mol dm-2. According to previous work, HOR always occurs at atop sites (both terrace and step sites).8, 9, 10, 11, 12 In Figure 2(C), the coverage of *H with different potential at different scan rates showed a clear difference. For the *Hstep in the cathodic scan, *H coverage vs potential is similar, while for the anodic scan, a strong peak appeared at 0.03 V. For the *Hterrace, disregarding the changes in intensity, this trend was also observed. The new peak at 0.03V was assigned to the HOR. This indicates that although the HOR process is fast and the intermediate *H in HOR is difficult to observe, future work using EC-SFG may further investigate HOR on Pt by leveraging different experimental scan rates.

1. **Density and Free Energy of *H at Pt Surface Calculated from Charge Q**

To obtain the *H density at Pt surfaces, we need to determine the electrochemically active surface area (ECSA) of the electrode. The ECSA of an electrode is a key parameter which can be estimated by the aera of the H region. From the CV of Pt in 0.05 M H2SO4 saturated with Ar shown in Figure S6, we obtained 0.143 mC for the reduction peak, which corresponds a 0.680 cm2 for Pt (a value of 210 μC•cm-2 for Pt 13, 14, 15). Compared with the geometrical area (0.19625 cm2), a 3.34 surface roughness (Rf) was obtained. We used this ECSA in all area-related calculations for this work, opposed to the geometrical surface area.

**Figure S6.** The CV of Pt in 0.05 M H2SO4 saturated with Ar, scan rate 100 mVs-1, range from 0.05 V to 1.55 V.


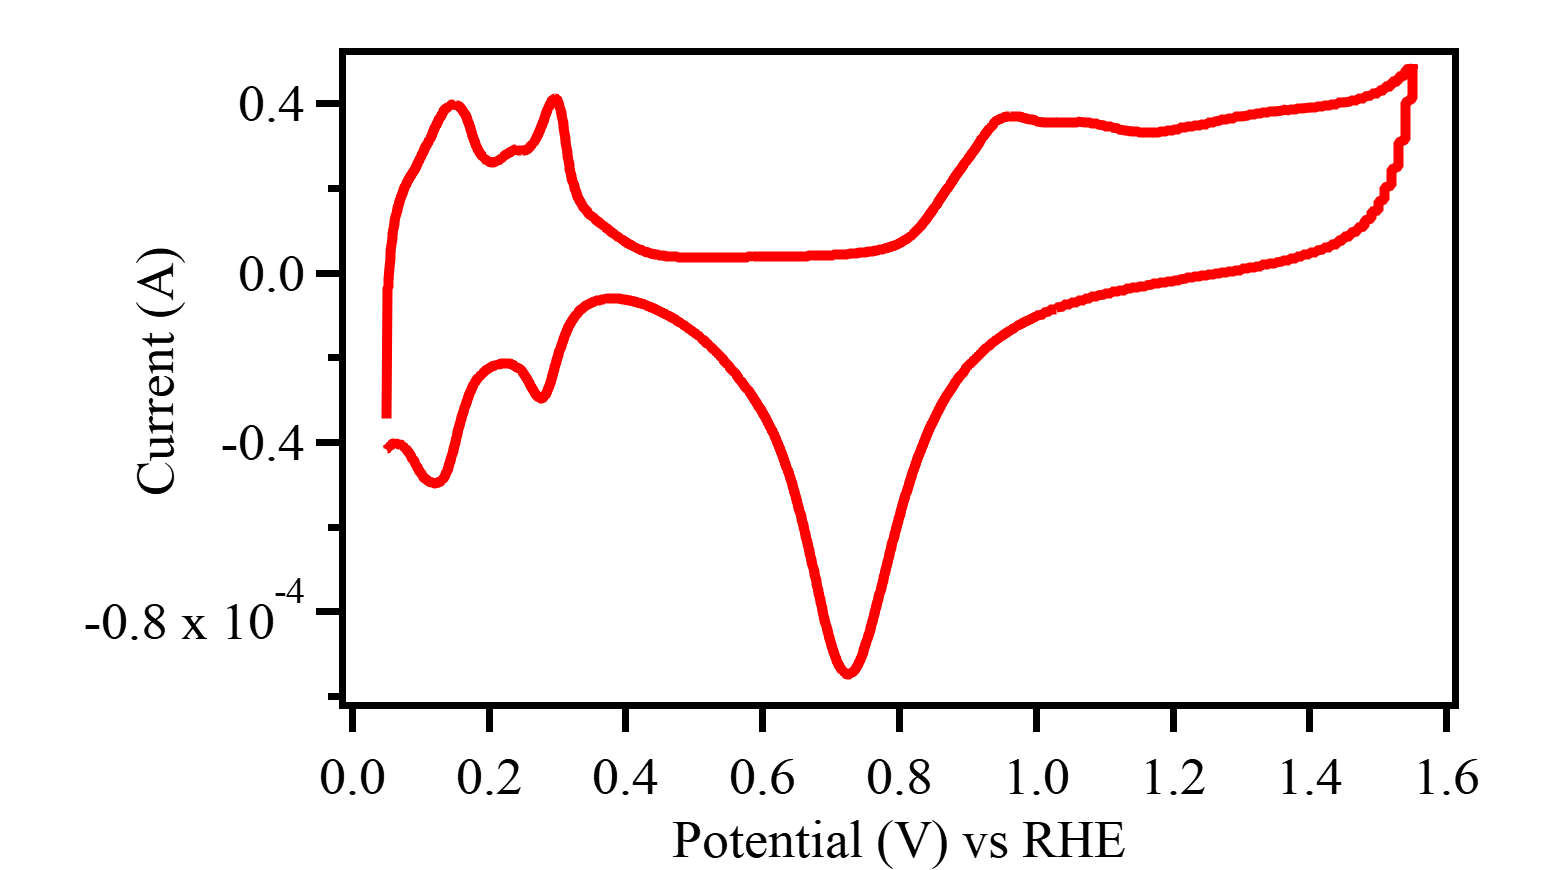


An electron carries a charge of 1.602×10-19 C, 1 mol contains 6.022×1023 electrons, and the ECSA is 0.68 cm2. The charge density σ (mol dm-2) at the surface can be expressed as

S(3)

The *H density at the surface is 2.2×10-7 mol dm-2, corresponding to the each *H occupying 7.64 Å2.

Under the assumption that one electron will be consumed to obtain one *H, we can determine the relationship of normalized SFG electric field vs the density of generated *H calculated from the charge, as shown in Figure 3. For different potential, the *H coverage is different. For -0.05 V for example, the *H density is 6.0×10-8 mol dm-2 when the surface is totally covered, which means that each *H occupies 27.7 Å2.

1. **Faradaic Current and Capacitive Current**

In this work, as the potential decreases from 0.5 V, the capacitive current becomes a significant factor influencing the results. Therefore, an approximate method was employed to subtract the capacitive contribution.


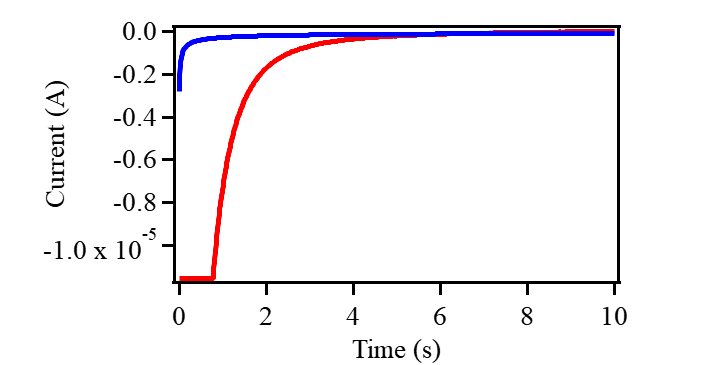

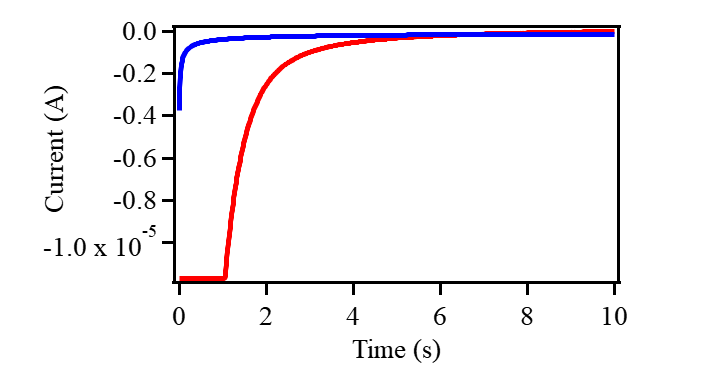


**Figure S7.** Correction of current (A) from 0.50 V to 0.15V, (B) from 0.50 V to 0.10V, (C) from 0.50 V to -0.05 V, (D) from 0.50 V to -0.10 V. The red line is the measured current and the blue line is the Faradaic current.


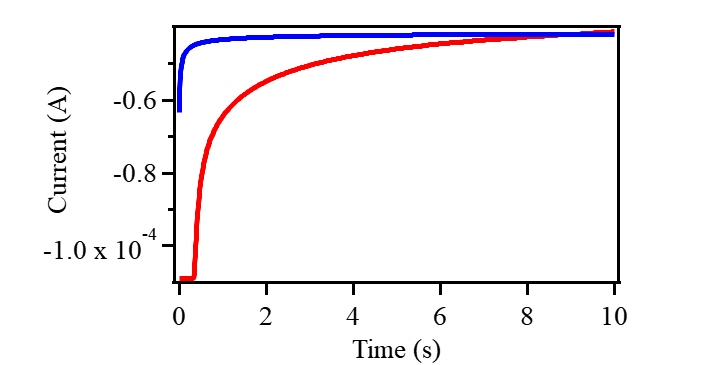

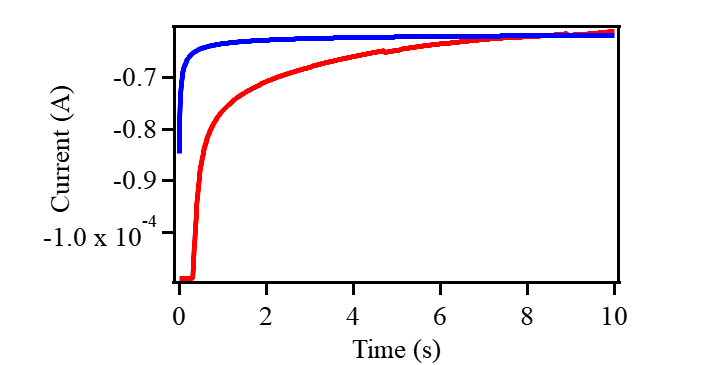


(A)

(B)

(C)

(D)

From the literature,16 upon a sudden change in potential, the total current response consists of two distinct components: the capacitive current and the Faradaic current. The capacitive current arises from the redistribution of interfacial charge and follows an exponential decay behavior, described by:

S(4)

where is the potential step amplitude, is the solution resistance, *C* is the double-layer capacitance, and *t* is time.

In contrast, the Faradaic current originates from electrochemical redox reactions at the electrode surface and is governed by semi-infinite linear diffusion. This process follows the Cottrell equation:

S(5)

where n is the number of electrons transferred, *F* is Faraday’s constant, *A* is electrode surface area, *c* is the concentration of the electroactive species, *D* is the diffusion coefficient and *t* is time. To facilitate data analysis, the total current response can be approximated by the sum of these two contributions:

S(6)

where *τ*, ​, and are fitting parameters corresponding to capacitive and Faradaic behaviors, respectively. As illustrated in Figure S7, the red trace represents the experimentally measured current response, while the blue trace corresponds to the fitted Faradaic component, which is directly associated with Pt–H* formation.

1. **The Generation Rates at Different Potentials**

Time (s)

Normalized SFG

Electric Field

Time (s)


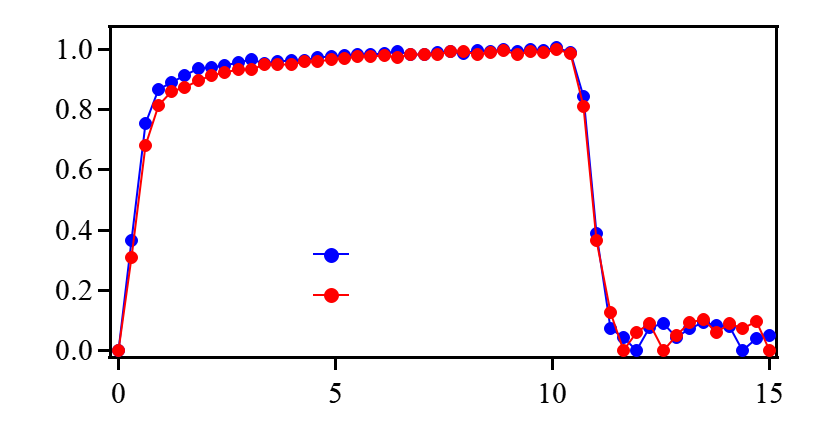


**Figure S8**. SFG electric field over time at generation potentials of 0.15 V (A), 0.10 V (B) and -0.10 V (C) applied for 10.0 s, followed by 0.50 V for 5.0 s.

(A)

(B)


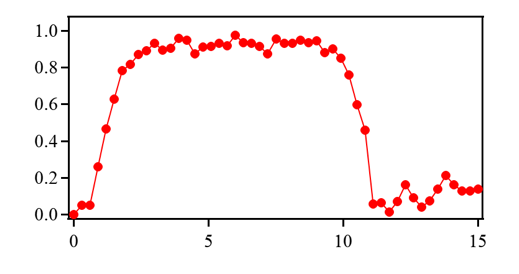

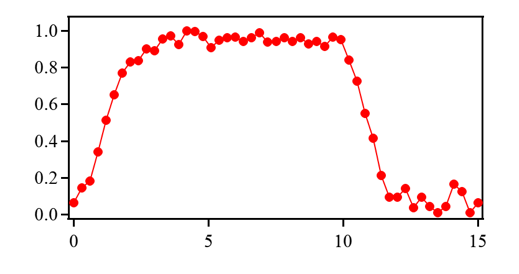


(C)

Time (s)

Normalized SFG

Electric Field

0.15 V 10 s 0.50 V 5 s

0.10 V 10 s 0.50 V 5 s

0.15 V 10 s 0.50 V 5 s

*Hstep

*Hterrace

Figure S8 shows the generation and desorption of *H at Pt surface at different generation potentials. We applied the potetial at 0.50 V for 5.0 s to clean the Pt electrode then applied different generation potentials (0.15 V, 0.10 V and -0.10 V) to generate the *H, followed by 0.50 V again to observe the decrease of the Pt-H* SFG intensity.

1. **The Binding Energy of Pt-H* at Different Potentials**

**Figure S9**. *H coverage as a function of H generation at 0.15 V (A), 0.10 V (B), -0.10 V (C).

(A)

(C)


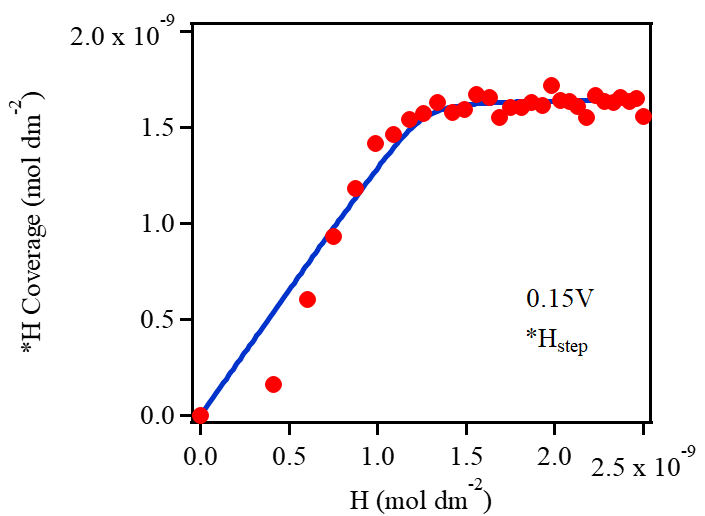

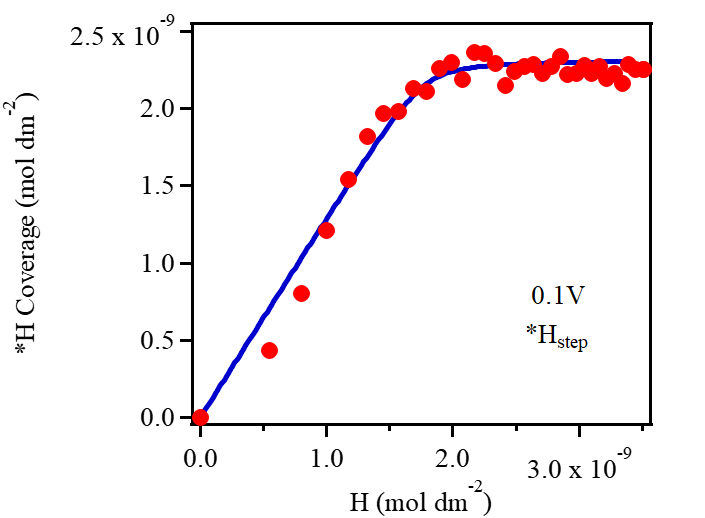

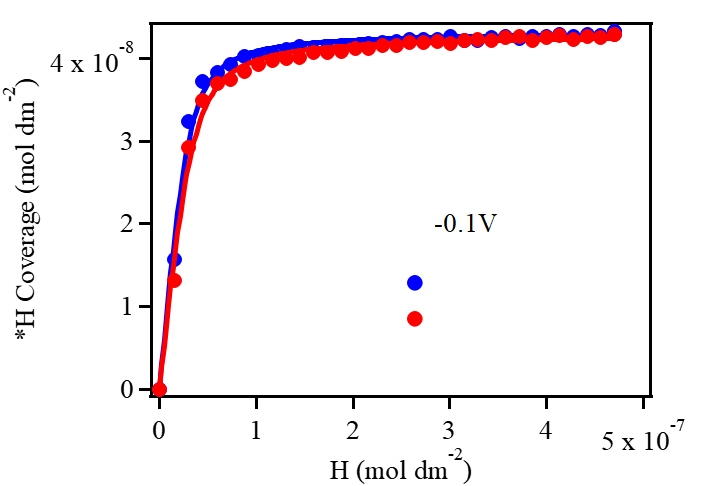


(B)

*Hstep

*Hterrace

Figure S9 shows the relationship between *H coverage with total generated H concentration at different potentials.

From equation (3),

S(7)

We can get , . And the discriminant and the solution of the equation is .

Divide both sides by and integrate:

S(8)

Integrating yields,

S(9)

Then exponentiating both sides and rearranging:

S(10)

From , we can get

S(11)

At time 0, the coverage is 0, . The .

S(12)

**Ⅷ. Tafel analysis: Tafel Slope and Exchange Current Density**

There are three elementary steps that occur for HER. First, HER proceeds through the Volmer reaction to generate *H with active sites denoted by *. Subsequently, either Tafel or Heyrovsky steps produce H2 as shown in Figure S10 (A): 17, 18

(S13)

(S14)

(S15)

The most common method to determine the rate-determining step (RDS) among these steps for HER is by the Tafel relation. Tafel analysis leads to two important physical parameters: the Tafel slope and the exchange current density: 19

(S16)

where is the overpotential (, the difference between the electrode and standard potentials),*a* reflects the overpotential required when the logarithm of the current density is zero, is the Tafel slope, and is the current density.


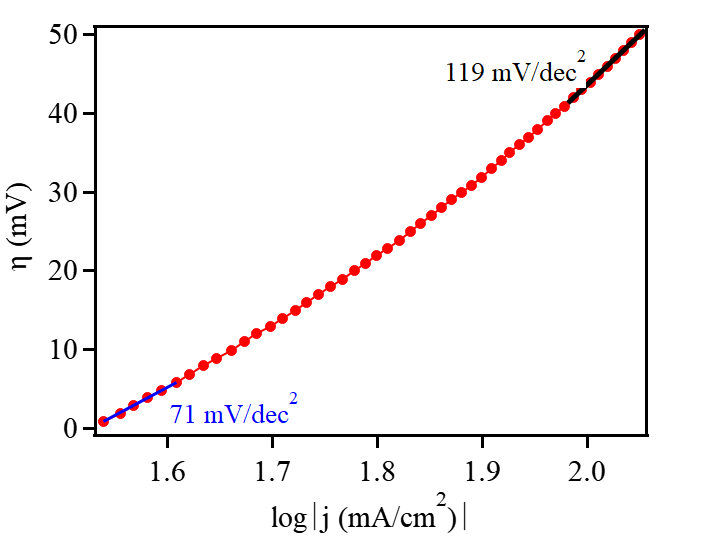


Figure S10. (A) The schematic diagram for Volmer, Tafel and Heyrovsky step. (B) The Tafel slope for Pt in 0.05 M H2SO4 saturated with Ar with a 20.0 mV s-1 scan rate.


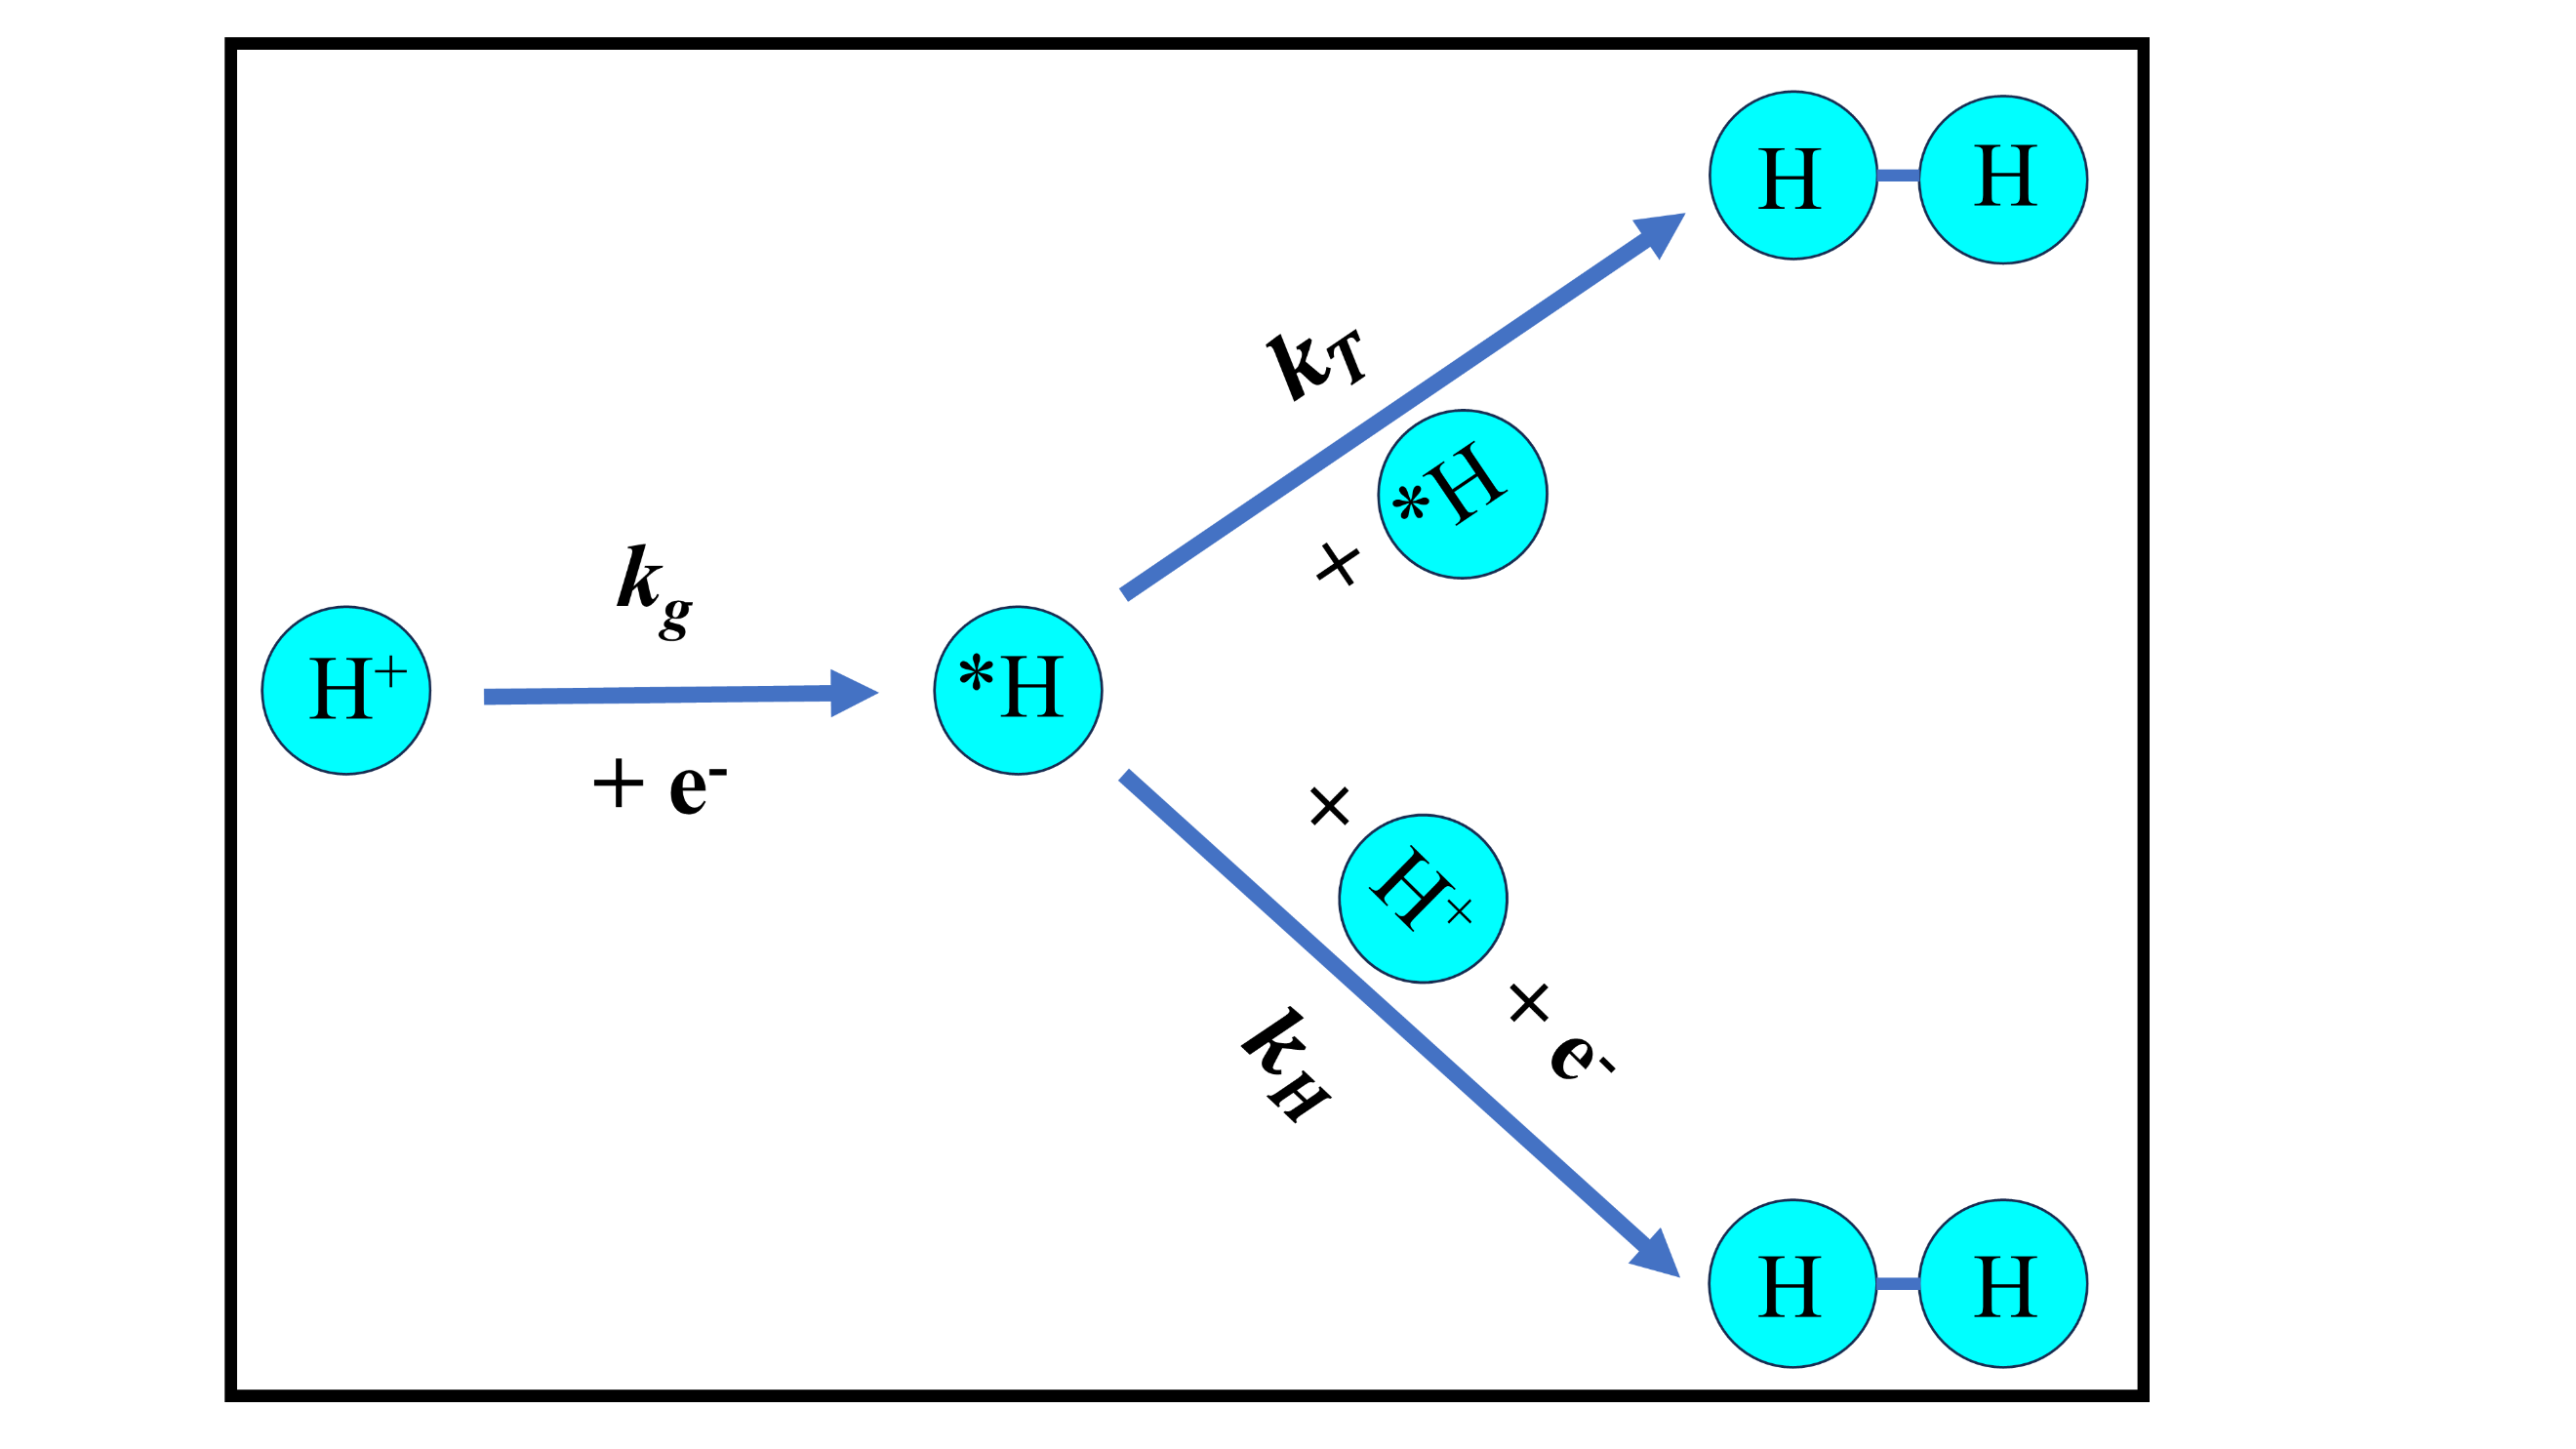


(A)

(B)

Figure S10 shows the Tafel slope for the Pt electrode in Ar-saturated 0.05 M H2SO4, with a resulting slope of 71 .0 mV dec-2 when the overpotential is less than 8 mV and increased to 119.0 mV dec-2 when the overpotential was close to 0.45 V. This result is similar to the literature19, 20 and indicates the Volmer step is the RDS in the HER process when the potential is close to 0.45 V, and Volmer–Heyrovsky step is the RDS when potential close to 0.

**Ⅸ.** **SI REFERENCES**

1. Wang H*, et al.* Orientational Geometry, Surface Density, and Binding Free Energy of Intermediates as Full Descriptors for Electrochemical CO2 Reduction at Metal Surfaces. *Journal of the American Chemical Society*, (2025).

2. Zhu Q, Wallentine SK, Deng G-H, Rebstock JA, Baker LR. The Solvation-Induced Onsager Reaction Field Rather than the Double-Layer Field Controls CO2 Reduction on Gold. *JACS Au* **2**, 472-482 (2022).

3. Braunschweig B, Mukherjee P, Kutz RB, Wieckowski A, Dlott DD. Sum-frequency generation of acetate adsorption on Au and Pt surfaces: Molecular structure effects. *The Journal of Chemical Physics* **133**, 234702 (2010).

4. Song Q-T*, et al.* Electric double layer contribution to sum frequency generation signal from Au electrode. *The Journal of Chemical Physics* **158**, 214709 (2023).

5. Wang * H-F, Gan † ‡ W, Lu † ‡ § R, Rao † ‡ ¶ Y, Wu † B-H. Quantitative spectral and orientational analysis in surface sum frequency generation vibrational spectroscopy (SFG-VS). *International Reviews in Physical Chemistry* **24**, 191-256 (2005).

6. Rakić AD, Djurišić AB, Elazar JM, Majewski ML. Optical properties of metallic films for vertical-cavity optoelectronic devices. *Appl Opt* **37**, 5271-5283 (1998).

7. Elgrishi N, Rountree KJ, McCarthy BD, Rountree ES, Eisenhart TT, Dempsey JL. A Practical Beginner’s Guide to Cyclic Voltammetry. *Journal of Chemical Education* **95**, 197-206 (2018).

8. Hoshi N, Asaumi Y, Nakamura M, Mikita K, Kajiwara R. Structural Effects on the Hydrogen Oxidation Reaction on n(111)−(111) Surfaces of Platinum. *The Journal of Physical Chemistry C* **113**, 16843-16846 (2009).

9. Juodkazis Ks, Juodkazytė J, Šebeka B, Juodkazis S. Reversible hydrogen evolution and oxidation on Pt electrode mediated by molecular ion. *Applied Surface Science* **290**, 13-17 (2014).

10. Wang Y, Wipf DO. Visualizing Hydrogen Oxidation Reaction Activity of Polycrystalline Platinum by Scanning Electrochemical Microscopy. *Journal of The Electrochemical Society* **167**, 146502 (2020).

11. Wilson JC, Caratzoulas S, Vlachos DG, Yan Y. Insights into solvent and surface charge effects on Volmer step kinetics on Pt (111). *Nature Communications* **14**, 2384 (2023).

12. Shen L, Goyal A, Chen X, Koper MTM. Cation Effects on Hydrogen Oxidation Reaction on Pt Single-Crystal Electrodes in Alkaline Media. *The Journal of Physical Chemistry Letters* **15**, 2911-2915 (2024).

13. Conway BE, Bai L. Determination of adsorption of OPD H species in the cathodic hydrogen evolution reaction at Pt in relation to electrocatalysis. *Journal of Electroanalytical Chemistry and Interfacial Electrochemistry* **198**, 149-175 (1986).

14. Trasatti S, Petrii OA. Real surface area measurements in electrochemistry. *Journal of Electroanalytical Chemistry* **327**, 353-376 (1992).

15. Zhan D, Velmurugan J, Mirkin MV. Adsorption/Desorption of Hydrogen on Pt Nanoelectrodes: Evidence of Surface Diffusion and Spillover. *Journal of the American Chemical Society* **131**, 14756-14760 (2009).

16. Allen J. Bard and Larry R. Faulkner, Electrochemical Methods: Fundamentals and Applications, New York: Wiley, 2001, 2nd ed. *Russian Journal of Electrochemistry* **38**, 1364-1365 (2002).

17. Zhang T, Anderson AB. Hydrogen Oxidation and Evolution on Platinum Electrodes in Base:  Theoretical Study. *The Journal of Physical Chemistry C* **111**, 8644-8648 (2007).

18. El-Shafie M. Hydrogen production by water electrolysis technologies: A review. *Results in Engineering* **20**, 101426 (2023).

19. Shinagawa T, Garcia-Esparza AT, Takanabe K. Insight on Tafel slopes from a microkinetic analysis of aqueous electrocatalysis for energy conversion. *Scientific Reports* **5**, 13801 (2015).

20. Ringe S. Approaching in-depth mechanistic understanding of electrochemical hydrogen conversion from computational simulations. *Chem Catalysis* **1**, 1160-1162 (2021).
